# Supplementary material for: Diagnostic Accuracy of Point-of-Care Testing for Diabetic Ketoacidosis at Emergency-Department Triage: β-Hydroxybutyrate versus the urine dipstick
Source: PubMed Central journal article supplement — Diabetes Care. 2011 Mar 21;34(4):852–4. doi: 10.2337/dc10-1844 (PMC3064039; doi:10.2337/dc10-1844), 2011-03-21
Supplement: supp_dc10-1844v101844_DC101844SupplementaryData.pdf [file supp_dc10-1844v101844_DC101844SupplementaryData.pdf]

SUPPLEMENTARY DATA

**Supplementary Table 1. Sensitivity, specificity, positive and negative predictive values of  $\beta$ -OHB at alternate cutoffs**

| <u><math>\beta</math>-OHB Cutoff</u> | <u>Sensitivity</u> | <u>Specificity</u> | <u>Positive Predictive Value</u> | <u>Negative Predictive Value</u> |
|--------------------------------------|--------------------|--------------------|----------------------------------|----------------------------------|
| >0.6                                 | 100%               | 61.7%              | 23.4%                            | 100%                             |
| >0.7                                 | 100%               | 66.7%              | 26.0%                            | 100%                             |
| >0.8                                 | 98.1%              | 69.5%              | 27.3%                            | 99.7%                            |
| >0.9                                 | 98.1%              | 71.2%              | 28.5%                            | 99.7%                            |
| >1.0                                 | 98.1%              | 72.3%              | 29.3%                            | 99.7%                            |
| >1.1                                 | 98.1%              | 74.0%              | 30.6%                            | 99.7%                            |
| >1.2                                 | 98.1%              | 75.5%              | 31.9%                            | 99.7%                            |
| >1.3                                 | 98.1%              | 77.3%              | 33.5%                            | 99.7%                            |
| >1.4                                 | 98.1%              | 78.4%              | 34.6%                            | 99.7%                            |
| >1.5                                 | 98.1%              | 78.6%              | 34.9%                            | 99.7%                            |
| >1.6                                 | 98.1%              | 79.4%              | 35.8%                            | 99.7%                            |
| >1.7                                 | 98.1%              | 80.1%              | 36.6%                            | 99.7%                            |
| >1.8                                 | 98.1%              | 80.7%              | 37.3%                            | 99.7%                            |
| >1.9                                 | 98.1%              | 80.7%              | 37.3%                            | 99.7%                            |
| >2.0                                 | 98.1%              | 82.3%              | 39.3%                            | 99.7%                            |
| >2.1                                 | 96.3%              | 82.7%              | 39.4%                            | 99.5%                            |
| >2.2                                 | 96.3%              | 83.5%              | 40.6%                            | 99.5%                            |
| >2.3                                 | 96.3%              | 84.2%              | 41.6%                            | 99.5%                            |
| >2.4                                 | 96.3%              | 84.8%              | 42.6%                            | 99.5%                            |
| >2.5                                 | 96.3%              | 85.1%              | 43.0%                            | 99.5%                            |
| >2.6                                 | 94.4%              | 85.9%              | 44.0%                            | 99.3%                            |
| >2.7                                 | 94.4%              | 87.0%              | 45.9%                            | 99.3%                            |
| >2.8                                 | 94.4%              | 87.7%              | 47.2%                            | 99.3%                            |
| >2.9                                 | 90.7%              | 88.3%              | 47.6%                            | 98.8%                            |
| >3.0                                 | 90.7%              | 88.7%              | 48.5%                            | 98.8%                            |
